# Supplementary material
Source: publisher figshare collection journal article supplement (https://sage.figshare.com/ndownloader/files/14752376)
Supplement: Supplementary file 1 [file 14752376]

Figure S1: List of Figures and Appearances of Musical Quotations:

Figure 1. *Adeste Fideles*

m. 1-3, Clarinets

m. 54, E-flat Cornet, B-flat Cornets, Flugelhorns, Euphoniums, Basses

m. 70-74, B-flat Cornets, Flugelhorns, Horns, Euphoniums

Figure 2. *Dies irae*

m. 5-54 = “Fantasy on *Dies irae*”

m. 5, Flugelhorns

m. 10-11, Flutes

m. 12, Flute 1 (solo), Oboe 1 (solo)

m. 14-16, B-flat Cornet 1 (solo)

m. 17-20, Flutes

m. 17, E-flat Clarinet

m. 24-25, Flutes, Piccolo, Clarinets 2-3

m. 37-38, E-flat and B-flat Cornets, Horn 3

m. 39-40, E-flat Clarinet, B-flat Clarinet 1

m. 47, Soprano Sax

m. 144-147, Soprano Sax

Figure 3. *Over There*

m. 6, Horn 1 (solo)

m. 22, Trombone 1 (solo), Clarinet 1, Bassoon 1, Tenor Sax

m. 23, English Horn, Clarinet 1, Bassoon 1, Tenor Sax, Horn 1

Figure 4. *Lambeth (People of the Living God)*

m. 20, B-flat Clarinet 1

Figure 5. *Amazing Grace*

m. 20, Oboes

Figure 6. *Marching Through Georgia*

m. 37-38, Flute 1 (solo)

m. 39-40, Horn 1 (solo)

m. 65-68, Flutes

Figure 7. *Yankee Doodle*

m. 46, Bassoons, B-flat Cornets 1-2 (melody); Contra-alto Clarinet, Contrabass Clarinet, Alto Sax, Tenor Sax, String Bass, Horns 3-4, Trombone 2, Basses (harmony)

Figure 8. *Tenting on the Old Camp Ground*

m. 61-64, Clarinets

m. 61-62, Bassoons, Horns

m. 63-64, Euphoniums

m. 68-69, Flutes, Clarinets, Bassoons, Euphoniums

Figure 9. *Taps*

m. 75-82, Trumpet 1 (solo, offstage, muted)

m. 89-145, Bells, Marimba

m. 149, String Bass, Bells

Figure 10. *Bethany (“Nearer my God, to Thee”)*

m. 75-80, Flutes; Clarinets, Bassoons (offset)

Figure 11. *Second Regiment Connecticut National Guard March* (Trio, Bugles)

m. 87-145, Tutti

Figure 12. *For He’s A Jolly Good Fellow*

m. 121-125, Soprano Sax

Figure 13. *Battle Hymn of the Republic*

m. 132-136, E-flat Cornet (lead voice), E-flat Clarinet, B-flat Clarinet 1 (join).

Figure S2

Charles Ives: *Decoration Day*

Form Chart and Borrowed Tunes

“Fantasy on *Dies Irae*”

B

M

L

K

I

H

G

F

E

C

D

A

Hymn

Taps

*Adeste Fidelis*

Parade Formed

•

•

R

Picking Flowers

Hose Cart

R

R

R

/

R

QR

•

QR

I I I I I I I I I I I I I I I I I I I I I I I I I I I I I I I I I I I I I I I I I I I I I I I I I I I I I I I I I I I I I I I I I I I I I I I I I I I I I I I I I I

1 3 5 7 9 11 13 15 17 19 21 23 25 27 29 31 33 35 37 39 41 43 45 47 49 51 53 55 57 59 61 63 65 67 69 71 73 75 77 79 81

RO

Taps

MG

AF

OT

AF

YD

OCG

MG

AG

AF

OT

B

OCG

Church Bells?

DI

*(continues)*

L

Abbreviations:

R Point of Repose

QR Quasi-Repose

AF *Adeste Fideles*

DI *Dies irae*

OT *Over There*

AG *Amazing Grace*

L Lambeth

MG *Marching Through Georgia*

YD *Yankee Doodle*

B *Bethany*

RO “Roll-off”

2nd CT *Second Connecticut March*

JGF *Jolly Good Fellow*

BHR *Battle Hymn of the Republic*

R

Q

P

O

N

M

Reeves

*2nd CT* (Trio)

Ranks Formed (Roll-off)

*2nd CT* Final Fanfare

*2nd CT* Regimental 4th Strain

*2nd CT* (Trio) x2

Taps

•

I I I I I I I I I I I I I I I I I I I I I I I I I I I I I I I I I I I I I I I I I I I I I I I I I I I I I I I I I I I I I I I I I I I I I I

81 83 85 87 89 91 93 95 97 99 101 103 105 107 109 111 113 115 117 119 121 123 125 127 129 131 133 135 137 139 141 143 145 147 149

Taps

*(shadow)*

2nd CT

Taps

DI

BHR

JGF

RO
